# Supplementary material for: Broad Host Range of SARS-CoV-2 Predicted by Comparative and Structural Analysis of ACE2 in Vertebrates
Source: bioRxiv or medRxiv preprint supplement (doi:10.1101/2020.04.16.045302), 2020-04-18

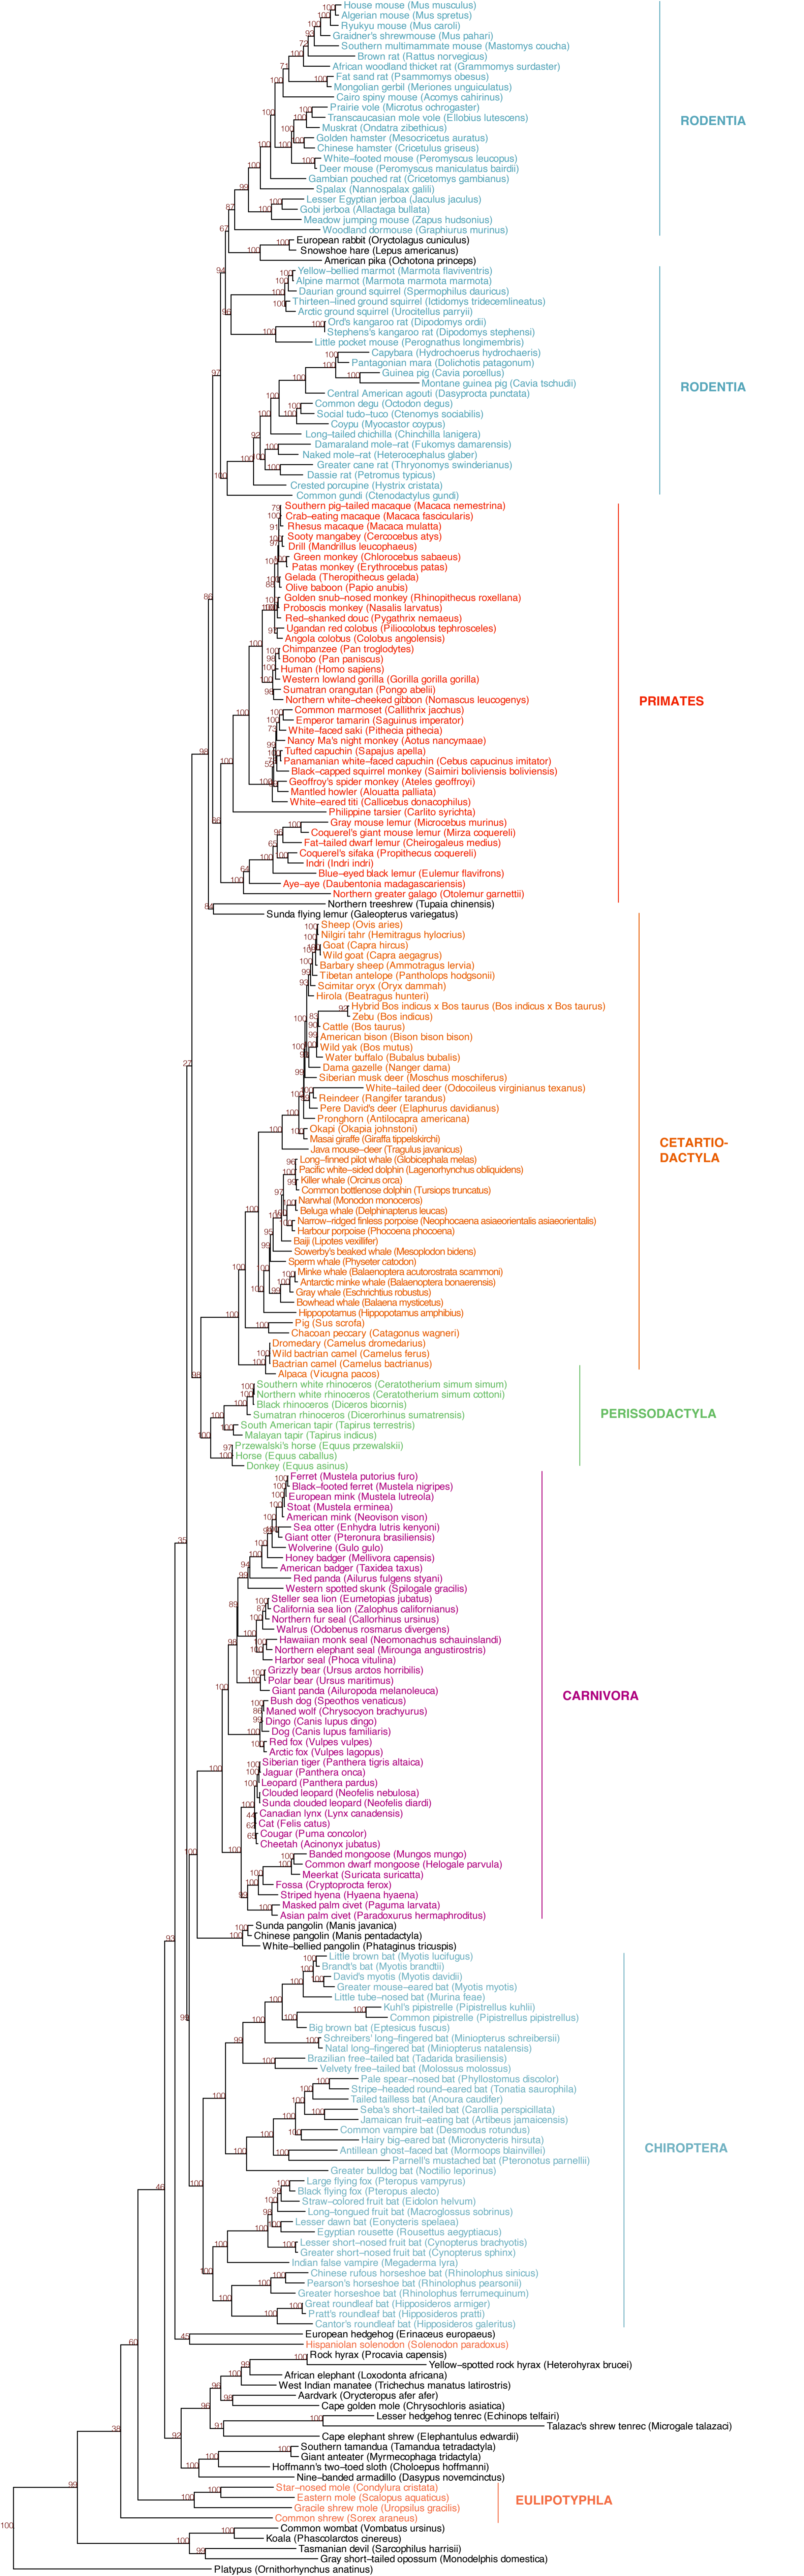

Supplement: Supplementary file [file media-6.pdf]
